# Supplementary material
Source: HighWire-hosted journal article supplement (https://bmjopen.bmj.com/content/11/8/e045063)

**Supplementary Figure1. Flowchart of data collection**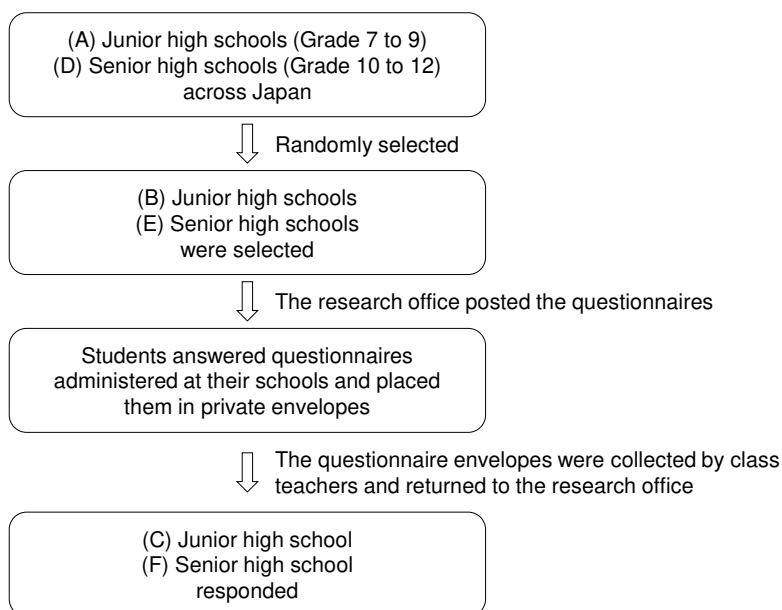

(A) – (F) in Supplementary Figure 1 correspond to (A) – (F) in Supplementary Table 1

**Supplementary Figure 2.**

Prevalence of alcohol use between the 7<sup>th</sup> grade and 11<sup>th</sup> grade in every four-year survey

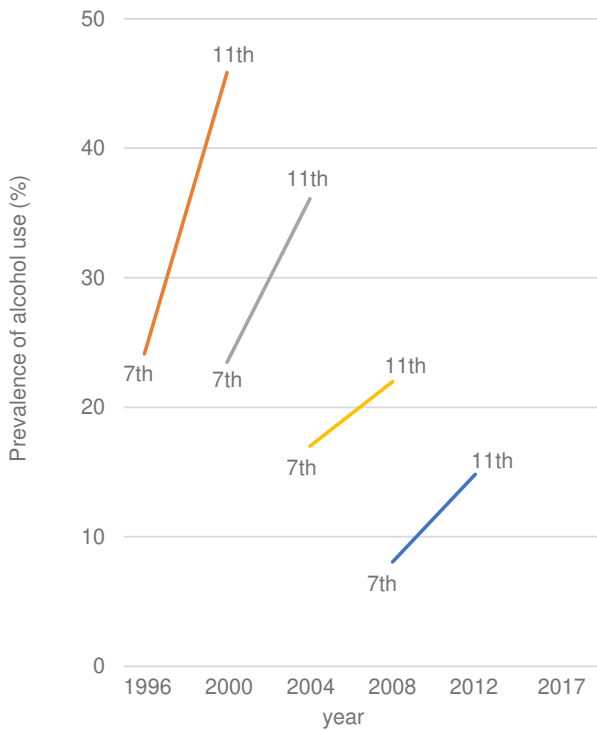

**Supplementary Figure 3.**

Prevalence of alcohol use between the 8<sup>th</sup> grade and 12<sup>th</sup> grade in every four-year survey; and between the 7<sup>th</sup> grade in 2012 and the 12<sup>th</sup> grade in 2017

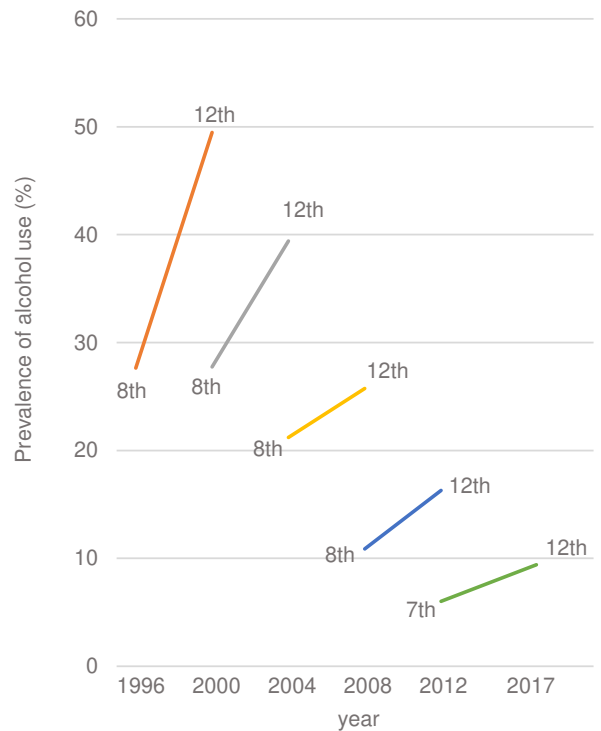

**Supplementary Figure 4.**

Prevalence of smoking between the 7<sup>th</sup> grade and 11<sup>th</sup> grade in every four-year survey

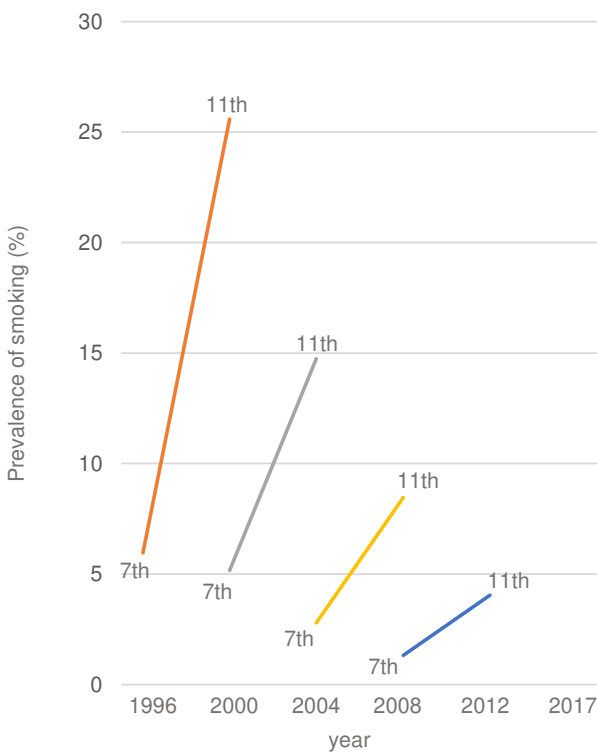

**Supplementary Figure 5.**

Prevalence of smoking between the 8<sup>th</sup> grade and 12<sup>th</sup> grade in every four-year survey; and between the 7<sup>th</sup> grade in 2012 and the 12<sup>th</sup> grade in 2017

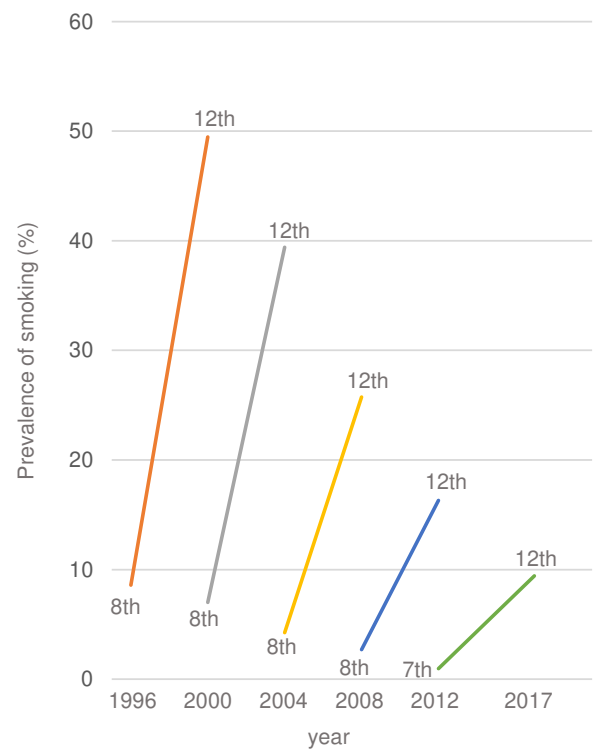

Supplement: inline-supplementary-material-2 [file inline-supplementary-material-2.pdf]
